# Supplementary material
Source: MDPI journal article supplement (https://www.mdpi.com/2071-1050/15/1/616)
Supplement: s1 [file s1 › sustainability-2105085-supplementary.pdf]

# A future-proof built environment through regenerative and circular lenses – Delphi approach for criteria selection

## S1. Supplementary file S1. Tables with final list of criteria and results

**Table S1.** List of ‘flows and stocks’ categories and criteria, with main results.

|                                                                        | Criteria                                                                                                                                             | Score   | Std.dev. | Median |
|------------------------------------------------------------------------|------------------------------------------------------------------------------------------------------------------------------------------------------|---------|----------|--------|
| <b>1.1 Greenhouse gases (GHG)</b>                                      |                                                                                                                                                      |         |          |        |
| 1.1.1                                                                  | Achieve net zero or climate positive embodied emissions for new buildings                                                                            | 93.75%  | 0.61     | 5      |
| 1.1.2                                                                  | Achieve net zero or climate positive embodied emissions for new infrastructure                                                                       | 81.25%  | 0.78     | 5      |
| 1.1.3                                                                  | Achieve climate positive emissions in operation of new/existing infrastructure                                                                       | 81.25%  | 0.86     | 4      |
| 1.1.4                                                                  | Achieve climate positive emissions in operation of new/existing buildings                                                                            | 81.25%  | 0.9      | 4.5    |
| 1.1.5                                                                  | Provide urban and non-urban greenhouse gases sinks (storage)                                                                                         | 93.75%  | 0.56     | 4      |
| <b>1.2 Energy</b>                                                      |                                                                                                                                                      |         |          |        |
| 1.2.1                                                                  | Maximise operational energy performance of buildings and infrastructure                                                                              | 96.78%  | 0.56     | 6      |
| 1.2.2                                                                  | Positive renewable energy production                                                                                                                 | 90.32%  | 0.87     | 6      |
| 1.2.3                                                                  | Grid connectivity providing renewable energy beyond project boundaries                                                                               | 81.25%  | 0.77     | 4.5    |
| 1.2.4                                                                  | Reduce the embodied energy content of new and retrofitted infrastructure                                                                             | 81.25%  | 0.77     | 4.5    |
| 1.2.5                                                                  | Smart energy systems (monitor and manage)                                                                                                            | 80.65%  | 0.82     | 5      |
| 1.2.8                                                                  | Reduce the embodied energy content of new and retrofitted buildings                                                                                  | 75.00%  | 0.85     | 5      |
| <b>1.3 Water</b>                                                       |                                                                                                                                                      |         |          |        |
| 1.3.1                                                                  | Protect and regenerate natural water systems                                                                                                         | 100.00% | 0.4      | 6      |
| 1.3.2                                                                  | Assess and prioritise, when adequate, local water autonomy and recirculation (sourcing, treatment, and reuse)                                        | 93.75%  | 0.61     | 4.5    |
| 1.3.3                                                                  | Maximise operational water performance of buildings and infrastructure                                                                               | 90.32%  | 0.76     | 6      |
| 1.3.4                                                                  | Manage stormwater: quantity and quality                                                                                                              | 83.87%  | 0.82     | 6      |
| 1.3.5                                                                  | Enhance supply water quality                                                                                                                         | 77.42%  | 1.14     | 5      |
| 1.3.6                                                                  | Reduce embodied water in the built environment                                                                                                       | 75.00%  | 0.78     | 4      |
| <b>1.4 Food system</b>                                                 |                                                                                                                                                      |         |          |        |
| 1.4.1                                                                  | Infrastructure/ measures to reduce, reuse and recycle food waste                                                                                     | 96.78%  | 0.55     | 5      |
| 1.4.2                                                                  | Provide infrastructure and enable local synergies for on-site food waste recycling/ composting linked to local farming and food growing initiatives. | 81.25%  | 0.73     | 4      |
| 1.4.3                                                                  | Provide spaces for local and diverse food production                                                                                                 | 70.97%  | 0.91     | 5      |
| 1.4.4                                                                  | Facilitate distribution or physical access to local healthy organic food                                                                             | 62.50%  | 1        | 4      |
| <b>1.5 Built environment stocks and flows (construction materials)</b> |                                                                                                                                                      |         |          |        |
| 1.5.1                                                                  | Improve lifespan, flexibility, adaptability, repairability, and shared use of buildings and public spaces                                            | 100.00% | 0.46     | 5      |
| 1.5.2                                                                  | Increase circularity/ renewal potential of built environment stock                                                                                   | 96.77%  | 0.56     | 6      |
| 1.5.3                                                                  | Optimise built environment materials inflows and outflows                                                                                            | 87.10%  | 0.67     | 5      |
| 1.5.4                                                                  | Provide digital/ physical infrastructure (depots/ marketplaces) to enable construction material loops                                                | 80.65%  | 0.78     | 5      |
| 1.5.5                                                                  | Life cycle sustainability assessment (LCSA) to assess various scenarios (cradle to cradle)                                                           | 80.64%  | 0.79     | 6      |
| <b>1.6 Resource sourcing</b>                                           |                                                                                                                                                      |         |          |        |
| 1.6.1                                                                  | (E) Prioritise reusable resources                                                                                                                    | 100.00% | 0.43     | 5      |
| 1.6.2                                                                  | Eliminate toxic and contaminating resources                                                                                                          | 93.55%  | 0.61     | 5      |
| 1.6.3                                                                  | (E) Prioritise recyclable resources                                                                                                                  | 87.50%  | 0.68     | 4      |

|                                                                                  |                                                                                                      |        |      |   |
|----------------------------------------------------------------------------------|------------------------------------------------------------------------------------------------------|--------|------|---|
| 1.6.4                                                                            | Prioritise biobased materials and inputs                                                             | 83.87% | 0.67 | 5 |
| 1.6.5                                                                            | Prioritise recovered resources                                                                       | 83.87% | 0.68 | 6 |
| 1.6.6.                                                                           | (N) Implement track and trace measures for resources in the value chain                              | 81.25% | 0.78 | 5 |
| 1.6.7                                                                            | Prioritise sustainability labelled products and transparent supply chains                            | 80.64% | 0.76 | 5 |
| 1.6.8                                                                            | Prioritise local resources                                                                           | 77.42% | 0.85 | 5 |
| 1.6.9                                                                            | (N) Prioritise easily assembled construction components                                              | 75.00% | 0.93 | 4 |
| <b>1.7 Material loops in operation</b>                                           |                                                                                                      |        |      |   |
| 1.7.1                                                                            | (E) Circularity requirements in design, operation, deconstruction and waste contracts                | 93.75% | 0.61 | 5 |
| 1.7.2                                                                            | Track and reduce or eliminate non-recoverable waste                                                  | 87.10% | 0.78 | 5 |
| 1.7.3                                                                            | Provide digital/ physical infrastructure (depots/ marketplaces) to enable operational material loops | 80.65% | 0.74 | 5 |
| 1.7.4                                                                            | Track and increase operational waste recovery and looping rates                                      | 77.42% | 0.81 | 6 |
| <i>Note: the median range varies from round 1 (*, 1-6) to round 2 (**, 1-5):</i> |                                                                                                      |        |      |   |

**Table S2.** List of ‘urban systems’ categories and criteria, with main results.

|                                                                                  | <b>Criteria</b>                                                                                 | <b>Score</b> | <b>Std.dev.</b> | <b>Median</b> |
|----------------------------------------------------------------------------------|-------------------------------------------------------------------------------------------------|--------------|-----------------|---------------|
| <b>2.1 Adaptive resilience</b>                                                   |                                                                                                 |              |                 |               |
| 2.1.1                                                                            | Increase the adaptive resilience of critical infrastructure                                     | 96.78%       | 0.56            | 5             |
| 2.1.2                                                                            | Design, build and adapt urban systems and buildings for future conditions and risk mitigation   | 93.55%       | 0.61            | 5             |
| 2.1.3                                                                            | Identify and assess scenarios for potential geophysical hazards and future climatic conditions  | 87.10%       | 0.79            | 6             |
| 2.1.4                                                                            | Develop and implement contingency, emergency, and recovery plans                                | 87.10%       | 0.67            | 5             |
| <b>2.2 Access and diversity</b>                                                  |                                                                                                 |              |                 |               |
| 2.2.1                                                                            | Increase affordability, socioeconomic plurality and diversity of housing                        | 96.77%       | 0.64            | 6             |
| 2.2.2                                                                            | Universal and barrier-free design of all public spaces                                          | 90.32%       | 0.67            | 6             |
| 2.2.3                                                                            | Improve wayfinding and visual communication                                                     | 87.10%       | 0.61            | 5             |
| 2.2.4                                                                            | Provide accessible, non-fenced or privatized green spaces and parks                             | 87.10%       | 0.91            | 5             |
| 2.2.5                                                                            | Access to drinking water and sanitary facilities in public spaces                               | 87.10%       | 1.15            | 5             |
| 2.2.6                                                                            | Eliminate energy poverty                                                                        | 87.09%       | 0.79            | 6             |
| 2.2.7                                                                            | Facilitate access to amenities and services based on local needs                                | 83.87%       | 1.06            | 5             |
| 2.2.8                                                                            | Eliminate water poverty                                                                         | 80.64%       | 1.03            | 6             |
| <b>2.3 Mobility infrastructure</b>                                               |                                                                                                 |              |                 |               |
| 2.3.1                                                                            | (NC) Charging stations for electric vehicles                                                    | 93.75%       | 0.61            | 5             |
| 2.3.2                                                                            | (E) Integrate electric mobility as a support system to support an energy positive neighbourhood | 93.75%       | 0.61            | 4.5           |
| 2.3.3                                                                            | Increase transportation availability, affordability, diversity, connection, and access          | 90.32%       | 1.09            | 5             |
| 2.3.4                                                                            | Improve pedestrian mobility network                                                             | 87.09%       | 1.04            | 5             |
| 2.3.5                                                                            | Improve cycling network and support infrastructure                                              | 83.87%       | 1.36            | 5             |
| 2.3.6                                                                            | Improve quality of transit infrastructure                                                       | 77.41%       | 0.99            | 5             |
| 2.3.7                                                                            | (NC) Provide access to real-time transportation information                                     | 75.00%       | 0.81            | 4             |
| 2.3.8                                                                            | Provide zero-emission mobility share systems                                                    | 74.19%       | 1.15            | 5             |
| 2.3.9                                                                            | Plan urban freight for effective reverse logistics and resource flows                           | 70.97%       | 1.47            | 5             |
| <b>2.4 Smart and digital systems</b>                                             |                                                                                                 |              |                 |               |
| 2.4.1                                                                            | Smart infrastructure systems to monitor, optimise, and manage urban systems                     | 80.64%       | 0.72            | 5             |
| 2.4.2                                                                            | Ensure private data protection and security                                                     | 77.42%       | 1.28            | 5             |
| 2.4.3                                                                            | (N) Ensure interoperability, resilience and adaptability of smart and digital systems           | 75.00%       | 0.93            | 4             |
| 2.4.4                                                                            | Enhance digital connectivity infrastructure                                                     | 70.97%       | 0.83            | 5             |
| 2.4.5                                                                            | Ensure open access to local public data                                                         | 64.52%       | 1.08            | 5             |
| <b>2.5 Urban fabric</b>                                                          |                                                                                                 |              |                 |               |
| 2.5.1                                                                            | Improve, when possible, street network connectivity and permeability                            | 93.55%       | 0.59            | 5             |
| 2.5.2                                                                            | Prioritise compact, mixed-used and transit-oriented development                                 | 83.87%       | 1.03            | 5             |
| 2.5.3                                                                            | Optimise urban density (land use efficiency)                                                    | 80.64%       | 1.12            | 6             |
| <i>Note: the median range varies from round 1 (*, 1-6) to round 2 (**, 1-5):</i> |                                                                                                 |              |                 |               |

**Table S3.** List of ‘outdoor environmental quality’ categories and criteria, with main results.

| Criteria                                |                                                                                                        | Score  | Std.dev. | Median |
|-----------------------------------------|--------------------------------------------------------------------------------------------------------|--------|----------|--------|
| <b>3.1 Thermal comfort</b>              |                                                                                                        |        |          |        |
| 3.1.1                                   | Provide extreme weather warnings                                                                       | 83.87% | 0.74     | 6      |
| 3.1.2                                   | Preserve/improve the right to solar access on building facades                                         | 80.65% | 0.81     | 5      |
| 3.1.3                                   | Improve local microclimate and outdoor thermal comfort                                                 | 70.96% | 0.75     | 5      |
| 3.1.4                                   | Provide outdoor spaces for different weather conditions throughout the year                            | 67.74% | 0.96     | 5      |
| 3.1.1                                   | Provide extreme weather warnings                                                                       | 83.87% | 0.74     | 6      |
| <b>3.2 Air quality</b>                  |                                                                                                        |        |          |        |
| 3.2.1                                   | Eliminate local sources of air contamination                                                           | 96.78% | 0.65     | 6      |
| 3.2.2                                   | Protect air quality during construction activities and landscape maintenance                           | 93.55% | 0.7      | 5      |
| 3.2.3                                   | Actively improve air quality/ clean the air                                                            | 93.55% | 0.71     | 6      |
| 3.2.4                                   | Provide extreme air pollution warnings                                                                 | 83.87% | 0.83     | 6      |
| 3.2.5                                   | Monitor/ exhibit real-time air quality levels to citizens                                              | 61.29% | 0.98     | 5      |
| <b>3.3 Soundscape</b>                   |                                                                                                        |        |          |        |
| 3.3.1                                   | Measures to control noise                                                                              | 80.65% | 1        | 5      |
| 3.3.2                                   | Measures to control vibration                                                                          | 74.20% | 1.04     | 5      |
| 3.3.3                                   | Develop and implement a soundscape plan to improve the overall acoustic performance of the area        | 68.75% | 0.99     | 4      |
| <b>3.4 Visual comfort</b>               |                                                                                                        |        |          |        |
| 3.4.1                                   | Reduce/ eliminate outdoor light pollution and intrusion                                                | 70.97% | 0.91     | 5      |
| 3.4.2                                   | Improve outdoor lighting quality (visibility facilitation)                                             | 61.29% | 0.87     | 5      |
| 3.4.3                                   | Treat outdoor surfaces to minimise glare and discomfort                                                | 61.29% | 0.93     | 5      |
| <b>3.5 Beauty and sense of place</b>    |                                                                                                        |        |          |        |
| 3.5.1                                   | Adopt a people-centred approach for the management of local heritage and cultural goods and references | 87.50% | 0.7      | 4.5    |
| 3.5.2                                   | Reintegrate and honour local and traditional knowledge and cultures                                    | 87.10% | 0.8      | 6      |
| 3.5.3                                   | Design to enhance local history, materiality, and ecological & social characteristics                  | 83.88% | 0.72     | 5      |
| 3.5.4                                   | Design to promote emotional and sensorial responses                                                    | 75.00% | 0.78     | 4      |
| 3.5.5                                   | Preserve, promote, and highlight sights, landmarks, and public art                                     | 64.52% | 0.81     | 5      |
| <b>3.6 Safety and security</b>          |                                                                                                        |        |          |        |
| 3.6.1                                   | Adopt an urban 'safety and security' approach based on women, children, and older adults               | 93.75% | 0.61     | 5      |
| 3.6.2                                   | Implement crime prevention through environmental design                                                | 83.87% | 0.74     | 6      |
| 3.6.3                                   | Implement traffic calming and pedestrian safety measures                                               | 83.87% | 0.91     | 5      |
| <b>3.7 Public use space (proxemics)</b> |                                                                                                        |        |          |        |
| 3.7.1                                   | Variety of restorative open spaces for physical and mental health                                      | 93.55% | 0.62     | 6      |
| 3.7.2                                   | Variety of possible uses and activities in open public spaces                                          | 77.42% | 0.74     | 5      |
| 3.7.3                                   | Provide public spaces for events and placemaking interventions                                         | 74.19% | 0.69     | 5      |
| 3.7.4                                   | Variety of open public spaces that allow for isolation and interaction                                 | 67.74% | 0.98     | 5      |

**Table S4.** List of ‘bioconnectivity’ categories and criteria, with main results.

|                                                    | <b>Criteria</b>                                                                                        | <b>Score</b> | <b>Std.dev.</b> | <b>Median</b> |
|----------------------------------------------------|--------------------------------------------------------------------------------------------------------|--------------|-----------------|---------------|
| <b>4.1 Biosphere conservation and regeneration</b> |                                                                                                        |              |                 |               |
| 4.1.1                                              | Restore/renature water bodies                                                                          | 100.00%      | 0.47            | 5             |
| 4.1.2                                              | Increase and regenerate green areas and corridors within and around the urban fabric                   | 93.75%       | 0.6             | 5             |
| 4.1.3                                              | Prioritise infill, greyfield and brownfield retrofit and remediation                                   | 93.75%       | 0.6             | 5             |
| 4.1.4                                              | Provide ecological buffers around sensitive areas                                                      | 90.33%       | 0.66            | 5             |
| 4.1.5                                              | Regenerate and protect green areas outside the project                                                 | 90.33%       | 0.99            | 5             |
| 4.1.6                                              | Conserve and regenerate habitats for threatened and endangered species                                 | 90.32%       | 0.67            | 6             |
| <b>4.2 Impacts to biosphere and human health</b>   |                                                                                                        |              |                 |               |
| 4.2.1                                              | Assess conditions and implement actions to eliminate and reverse impacts                               | 83.88%       | 1.07            | 5             |
| 4.2.2                                              | Control construction activity pollution                                                                | 83.87%       | 0.87            | 5             |
| 4.2.3                                              | Use only flora adequate for the local context: non-invasive and adapted                                | 77.42%       | 1.13            | 5             |
| 4.2.4                                              | Reduce earthworks and restore soils previously disturbed                                               | 67.75%       | 1.05            | 5             |
| 4.2.5                                              | (NC/E) Implement bird-safe design guidelines for outdoor glazed surfaces                               | 62.50%       | 0.78            | 4             |
| <b>4.3 Ecosystem services</b>                      |                                                                                                        |              |                 |               |
| 4.3.1                                              | (Re)design open spaces, infrastructure, and building surfaces for optimal ecosystem services provision | 83.87%       | 0.73            | 5             |
| 4.3.2                                              | Prioritise biomimicry and nature-based solutions for built environment regeneration                    | 77.42%       | 0.75            | 5             |
| 4.3.3                                              | Conduct an ecosystem services assessment and valuation                                                 | 67.74%       | 1.04            | 5             |
| <b>4.4 Green infrastructure maintenance</b>        |                                                                                                        |              |                 |               |
| 4.4.1                                              | Implement long-term monitoring and maintenance of urban biodiversity and green infrastructure          | 87.09%       | 0.91            | 6             |
| 4.4.2                                              | Implement a soil management plan                                                                       | 70.97%       | 0.76            | 5             |
| 4.4.3                                              | Implement integrated pest management                                                                   | 61.29%       | 0.86            | 5             |

**Table S5.** List of ‘governance, community, and local economy’ categories and criteria, with main results.

|                                                     | <b>Criteria</b>                                                                                   | <b>Score</b> | <b>Std.dev.</b> | <b>Median</b> |
|-----------------------------------------------------|---------------------------------------------------------------------------------------------------|--------------|-----------------|---------------|
| <b>5.1 Local governance and participation</b>       |                                                                                                   |              |                 |               |
| 5.1.1                                               | Regenerative and circular policies and guidelines for buildings and infrastructure                | 90.32%       | 0.67            | 6             |
| 5.1.2                                               | Ensure inclusive, equitable, and collaborative participation of urban stakeholders                | 90.32%       | 0.94            | 6             |
| 5.1.3                                               | Support regenerative and circular initiatives developed by the community                          | 87.10%       | 0.69            | 5             |
| 5.1.4                                               | Monitor and report performance/ satisfaction (pre, during and post transition)                    | 83.87%       | 0.73            | 5             |
| 5.1.5                                               | Implement regenerative/ circular procurement and contract practices                               | 83.87%       | 0.76            | 6             |
| 5.1.6                                               | Enhance community governance structures                                                           | 77.42%       | 0.78            | 5             |
| 5.1.7                                               | Implement community management system to support transition/ regeneration and operation           | 77.42%       | 1.03            | 5             |
| 5.1.8                                               | Support community volunteer initiatives                                                           | 74.19%       | 1.01            | 5             |
| <b>5.2 Education and awareness</b>                  |                                                                                                   |              |                 |               |
| 5.2.1                                               | Provide community learning and training spaces (physical and digital)                             | 80.65%       | 0.84            | 5             |
| 5.2.2                                               | Provide information and training in regenerative and circular solutions for the built environment | 77.42%       | 0.89            | 6             |
| 5.2.3                                               | Ensure wide access to sustainability information                                                  | 74.19%       | 0.8             | 5             |
| 5.2.4                                               | Provide information and training in regenerative and circular solutions for the daily life        | 74.19%       | 0.98            | 5             |
| <b>5.3 Local economies and businesses ecosystem</b> |                                                                                                   |              |                 |               |
| 5.3.1                                               | Enable local and cross-sectoral resource loops                                                    | 80.65%       | 0.84            | 5             |
| 5.3.2                                               | Prioritise 'built environment' businesses with regenerative/ circular practices                   | 80.64%       | 0.85            | 6             |
| 5.3.3                                               | Support/ reward transition of local businesses to regenerative/ circular practices                | 80.64%       | 1.06            | 5             |
| 5.3.4                                               | Support and reward businesses with fair trade and socioenvironmental practices                    | 77.42%       | 0.85            | 5             |
| 5.3.5                                               | Foster transparency and corporate responsibility of local businesses                              | 74.20%       | 0.82            | 5             |
| 5.3.6                                               | Prioritise local waste management cooperatives                                                    | 70.97%       | 0.95            | 5             |
| 5.3.7                                               | Promote repair shops, cafes, and events                                                           | 64.52%       | 1.07            | 5             |
| 5.3.8                                               | Enable local 'banks of talents' for the community                                                 | 64.51%       | 0.96            | 5             |
| 5.3.9                                               | Prioritise community-owned/ controlled business                                                   | 62.50%       | 1.16            | 4             |
